# Supplementary material
Source: ML conference proceedings conference paper supplement (https://proceedings.mlr.press/v31/kambadur13a.html)
Supplement: Supplementary file [file kambadur13a-supp.pdf]

---

# Supplementary Material for AISTATS13 Submission #140

A Parallel, Block Greedy Method for Sparse Inverse Covariance Estimation for Ultra-high Dimensions

---

**Prabhanjan Kambadur**  
IBM T.J. Watson Research Center  
pkambadu@us.ibm.com

**Aurélie Lozano**  
IBM T.J. Watson Research Center  
aclozano@us.ibm.com

## 1 Forward Evaluator

---

Algorithm 1: ForwardEvaluator

---

**Input:**  $S$ : Sample covariance,  $\Sigma$ : Covariance,  $W$ : Inverse covariance,  $L$ : likelihood,  $bs$ : Block size.  
**Output:**  $M$ : selected candidates

```
1  $M = \text{MAP}(L \rightarrow (\text{row}, \text{col}, \alpha), bs)$ ;  
2 for  $i = 1 : p$  do  
3   for  $j = (i + 1) : p$  do  
4     if  $(i, j, *) \in W$  then continue;  
5      $\alpha_{ij} = \text{ComputeAlpha}(S, \Sigma, (i, j))$ ;  
6     if  $\alpha_{ij} == \infty$  then continue;  
7      $L_{ij} = L + \log((1 + \alpha_{ij}\sigma_{ij})^2 - \alpha_{ij}^2\sigma_{ii}\sigma_{jj}) - 2\alpha_{ij}s_{ij}$ ;  
8     if  $(\text{Full}(M) \ \&\& \ (L_{ij} \geq \text{MaxKey}(M)))$  then  
9       continue;  
10     $M = (\text{Full}(M))?(M \setminus M[\text{MaxKey}(M)]) : M$ ;  
11     $M = M \cup (L_{ij} \rightarrow (i, j, \alpha_{ij}))$ ;  
12 return  $M$ ;
```

---

In the forward phase, GreedyInverseCovariance() selects the top  $bs$  candidates by calling ForwardEvaluator() (Algorithm 1). Briefly, this algorithm checks each of the (as yet unselected) positions in the upper (or lower) triangular matrix of  $W$  and returns a map of the top  $bs$  candidates. For each candidate,  $\alpha_{ij}$  is computed and subsequently, the likelihood when  $\alpha_{ij}(e_{ij} + e_{ji})$  is added to  $W$  is computed.

## 2 Backward Evaluator

To enhance the accuracy of our method, we execute a backward step at the end of each iteration; the goal of BackwardEvaluator() (Algorithm 2) is to remove those  $(i, j)$ 's, which contribute the least to  $L$ . Briefly, this algorithm checks each of the selected positions in  $W$  and returns a map of the bottom  $bs$  candidates. For each candidate, we evaluate  $L$  in the absence of the candidate, which is the same as adding a new candidate  $(i, j, -\alpha_{ij})$  to  $W$ .

---

Algorithm 2: BackwardEvaluator

---

**Input:**  $S$ : Sample covariance,  $\Sigma$ : Covariance,  $W$ : Inverse covariance,  $L$ : likelihood,  $bs$ : Block size.  
**Output:**  $M$ : selected candidates

```
1  $M = \text{MAP}(L \rightarrow (\text{row}, \text{col}, \alpha), bs)$ ;  
2 for  $i = 1 : p$  do  
3   for  $j = (i + 1) : p$  do  
4     if  $(i, j, \alpha_{ij}) \notin W$  then continue;  
5      $\gamma_{ij} = -\alpha_{ij}$ ;  
6      $L_{ij} = L + \log((1 + \gamma_{ij}\sigma_{ij})^2 - \gamma_{ij}^2\sigma_{ii}\sigma_{jj}) - 2\gamma_{ij}s_{ij}$ ;  
7     if  $(\text{Full}(M) \ \&\& \ (L_{ij} \leq \text{MinKey}(M)))$  then  
8       continue;  
9      $M = (\text{Full}(M))?(M \setminus M[\text{MinKey}(M)]) : M$ ;  
10     $M = M \cup (L_{ij} \rightarrow (i, j, \gamma_{ij}))$ ;  
11 return  $M$ ;
```

---

---

Algorithm 3: Update

---

**Input:**  $M$ : A map of selected candidates,  $S_{p,p}$ : Sample covariance,  $\Sigma_{p,p}$ : Covariance,  $W$ : Inverse covariance,  $L$ : likelihood  
**Output:**  $(W, \Sigma, L)^{new}$ : Updated values

```
1 while  $M \neq \emptyset$  do  
2    $(i, j, \alpha) = \text{RemoveMaxKey}(M)$ ;  
3    $L = L + \log((1 + \alpha_{ij}\sigma_{ij})^2 - \alpha_{ij}^2\sigma_{ii}\sigma_{jj}) - 2\alpha_{ij}s_{ij}$ ;  
4    $W = W + \alpha(e_{ij} + e_{ji})$ ;  
5    $\Sigma =$   
6      $\Sigma - \frac{\alpha(1 + \alpha_{ij}\sigma_{ij})(\Sigma_i \Sigma_j^T + \Sigma_j \Sigma_i^T) + \alpha^2(\sigma_{jj}\Sigma_i \Sigma_i^T + \sigma_{ii}\Sigma_j \Sigma_j^T)}{(1 + \alpha_{ij}\sigma_{ij})^2 - \alpha_{ij}^2\sigma_{ii}\sigma_{jj}}$ ;  
7 return  $(W, \Sigma, L)$ 
```

---

### 3 Updating state

Once the candidates are selected, the next step is to update  $L$ ,  $W$  and  $\Sigma$  to reflect the addition/deletion of the new candidates by calling `Update()` (Algorithm 3). Briefly, for each new candidate that we will add/remove, we update the likelihood, add  $\alpha(e_{ij} + e_{ji})$  to  $W$ , and update  $\Sigma$  to reflect addition to  $W$ . Note that  $W$  is stored as  $(i, j, v)$  values and that candidates can be added in parallel.

### 4 Refit

---

#### Algorithm 4: Refit

---

**Input:**  $W$ : Inverse covariance,  $\Sigma$ : Covariance,  $L$ : likelihood,  $S$ : Sample covariance,  $\epsilon$ : tolerance.  
**Output:**  $(W, \Sigma, L)^{new}$ : refitted variables.

```

1 while true do
2   for  $i = 1 : p$  do
3     for  $j = (i + 1) : p$  do
4       if  $(i, j, *) \notin W$  then continue;
5        $\alpha_{ij} = \text{ComputeAlpha}(S, \Sigma, (i, j))$ ;
6       if  $\alpha_{ij} == \infty$  then continue;
7        $L_{ij} =$ 
8          $L + \log((1 + \alpha_{ij}\sigma_{ij})^2 - \alpha_{ij}^2\sigma_{ii}\sigma_{jj}) - 2\alpha_{ij}s_{ij}$ ;
9       if  $L_{ij} - L < \epsilon$  then return  $(W, \Sigma, L)$ ;
10       $L = L_{ij}$ ;  $W_{ij} = W_{ij} + \alpha_{ij}$ ;  $W_{ji} = W_{ij}$ ;
11       $\Sigma = \Sigma -$ 
12         $\frac{\alpha(1 + \alpha_{ij}\sigma_{ij})(\Sigma_i\Sigma_j^T + \Sigma_j\Sigma_i^T) + \alpha^2(\sigma_{jj}\Sigma_i\Sigma_i^T + \sigma_{ii}\Sigma_j\Sigma_j^T)}{(1 + \alpha_{ij}\sigma_{ij})^2 - \alpha_{ij}^2\sigma_{ii}\sigma_{jj}}$ ;

```

---

After updating the required values, we re-estimate the value of the model parameters  $(W, \Sigma, L)$  to propagate the selection/removal of the current set of candidates using `Refit()` (Algorithm 4). Refitting is done using coordinate descent by iteratively re-estimating one position of  $W$  in each iteration; the procedure stops when the change in  $L$  is smaller than  $\epsilon_r$ , the tolerance for refitting. Note that we only need to refit those entries in  $W$ , which share a common row or column with any of the chosen candidates, which is an optimization that is not shown in Algorithm 4.

### 5 Proof of Theorem 1

We consider a variant of GINCO, where the forward step breaks if  $\delta_f = \sup_{(i,j) \in M} L - (L + \alpha_{i,j}e_{i,j}) < \epsilon_f$ , where  $L$  is the log likelihood loss upon entering `ForwardEvaluator()` and  $M$  are the candidates selected by `ForwardEvaluator()`, and the backward step breaks if  $\delta_b = \inf_{(i,j) \in M} (L - \alpha_{i,j}e_{i,j}) - L > \epsilon_b\delta_f$ , where  $L$  is the log likelihood loss upon entering `BackwardEvaluator()` and  $M$  are the candidates selected by `BackwardEvaluator()`, and consider  $\epsilon_b = 1/2$  for simplicity.

We adapt the reasoning in [1] so as to account for blocking. First, regardless of the block size, Lemma 1-3 in [2] insure that the strong convexity and strong smoothness assumptions required by [1] are satisfied. The proof then relies on the following lemmas, which are adapted from [1]. Denote by  $\kappa_u = l$  and  $\kappa_u$  the restricted strong convexity and restricted strong smoothness parameters, respectively. These will be specialized in the theorem, using the assumptions on the restricted eigenvalues property. Let  $\rho = \kappa_u/\kappa_l$ .

**Lemma 1** (Stopping Forward Step) *Let  $W^*$  and  $S^*$  denote the population inverse covariance matrix and its support, respectively. When GINCO stops with estimated inverse covariance  $\hat{W}$ , supported on  $\hat{S}$ , there holds*

$$\left| L(\hat{W}) - L(W^*) \right| < \sqrt{2|S^* - \hat{S}|\kappa_u\epsilon_S} \|\hat{W} - W^*\|_2.$$

*Proof* The proof for Lemma 1 follows from the exact same arguments as that of Lemma 5 in [1], noting that the breaking condition for GINCO's forward step implies that when the algorithm terminates  $L(\hat{W}) - \inf_{(i,j) \in \hat{S}^{c,\alpha}} L(\hat{W} + \alpha e_{i,j}) < \epsilon_f$ .  $\square$

**Lemma 2** (Stopping Error Bound) *Let  $W^*$  and  $S^*$  denote the population inverse covariance matrix and its support, respectively. When GINCO stops with estimated inverse covariance  $\hat{W}$ , supported on  $\hat{S}$ , there holds*

$$\|\hat{W} - W^*\|_2 \leq \frac{2}{\kappa_l} \left( c\sqrt{\frac{\log(p)}{n}} \sqrt{|S^* \cup \hat{S}|} + \sqrt{2|S^* \cup \hat{S}|\rho^2 C_{\min}^2 \epsilon_f} \right).$$

*Proof* The proof follows by the same reasoning as for Lemma 6 in [1] and by noting that Lemma 3 in [2] implies that the  $l_\infty$  norm of the gradient of the loss at the true inverse covariance is upper-bounded by  $\lambda_n$  where  $\lambda_n \leq c\sqrt{\frac{\log(p)}{n}}$ .  $\square$

**Lemma 3** (Stopping Backward Step) *Let  $W^*$  and  $S^*$  denote the population inverse covariance matrix and its support, respectively. When GINCO stops with estimated inverse covariance  $\hat{W}$ , supported on  $\hat{S}$ , there holds*

$$\|\hat{\Delta}_{\hat{S}-S^*}\|_2^2 \geq \frac{\epsilon_f}{\kappa_u} |S^* - \hat{S}|.$$

*Proof* The proof follows the same arguments as that of Lemma 7 in [1], noting that when GINCO terminates, the backward step with the current  $\hat{W}$  has failed to go through, and hence there holds

$$\inf_{(i,j) \in \hat{S}} L(\hat{W} - \hat{\alpha}_{i,j}e_{i,j}) - L(\hat{W}) > \epsilon_f\epsilon_b,$$

where  $\epsilon_b = 1/2$ .  $\square$

Consider the first time the support size reaches  $kb$  at the beginning of the forward step. Let  $\Delta^{(k)} = \hat{W}_{\hat{\mathcal{S}}^{(k-1)}}^{(k)} - \hat{W}^{(k-1)}$ . Following a similar reasoning as in the proof of Lemma 9 in [1], we can show that  $\|\Delta^{(k)}\|_2 \leq \frac{2\kappa_u}{\kappa_l^2} \sqrt{(\kappa_u - \kappa_l)b\delta_f^{(k)}}$ , where  $b$  is the block size, and we obtain the following lemma.

**Lemma 4** (General Backward Step) *The first time GINCO reaches a support size of  $kb > |\mathcal{S}^*| + 4(\kappa_u/\kappa_l)^4 b + 1$  at the beginning of the forward step we have*

$$\|\hat{W}_{\hat{\mathcal{S}}^{(k-1)} - \mathcal{S}^*}^{(k-1)}\|_2^2 \geq \left( \sqrt{\frac{|\hat{\mathcal{S}}^{(k-1)} - \mathcal{S}^*|}{\kappa_u}} - \frac{2\kappa_u \sqrt{(\kappa_u - \kappa_l)b}}{\kappa_l^2} \right)^2 \delta_f^{(k)}.$$

The following lemma follows from Lemma 11 in [1].

**Lemma 5** (General Error Bound) *The first time GINCO reaches a support size of  $kb$  at the beginning of the forward step we have*

$$\|\hat{W}_{\hat{\mathcal{S}}^{(k-1)} - \mathcal{S}^*}^{(k-1)}\|_2^2 \leq \frac{4\kappa_u |\mathcal{S}^* \cup \hat{\mathcal{S}}^{(k-1)}| \delta_f^{(k)}}{\kappa_l^2} \left( \frac{c\sqrt{\log(p)/n}}{\sqrt{\kappa_u \epsilon_f}} + \sqrt{\frac{2|\hat{\mathcal{S}}^{(k-1)} - \mathcal{S}^*|}{|\mathcal{S}^* \cup \hat{\mathcal{S}}^{(k-1)}|}} \right)^2.$$

This allows us to obtain the last key lemma.

**Lemma 6** (Stopping Size) *If*

$$\epsilon_f > \frac{\left( c\sqrt{\frac{\log(p)}{n}} \right)^2}{\kappa_u} \left( \frac{\frac{1}{2\rho}\sqrt{\gamma} - \sqrt{\frac{(\rho^2 - \rho)b}{s^*}}}{\sqrt{1 + \gamma}} - \sqrt{\frac{2}{2 + \gamma}} \right)^{-2}$$

with  $\gamma \geq 4\rho^2 \left( \sqrt{\frac{(\rho^2 - \rho)b}{s^*}} + \sqrt{2} \right)^2$ , then the algorithm stops with  $kb \leq (1 + \gamma)s^* + 1$ , where  $s^*$  is the support size of the true inverse covariance.

*Proof* Let  $kb = (1 + \gamma)s^*$ , where  $s^*$  is the support size of the true inverse covariance. Following the reasoning of the proof of Lemma 8 in [1], and applying Lemma 4 and 5 above, we get

$$\frac{\frac{1}{2\rho}\sqrt{\gamma} - \sqrt{\frac{(\rho^2 - \rho)b}{s^*}}}{\sqrt{1 + \gamma}} - \sqrt{\frac{2}{2 + \gamma}} \leq \frac{c\sqrt{\log(p)/n}}{\sqrt{\kappa_u \epsilon_f}}.$$

$\square$

Then similarly as in Lemma 4 in [1] we can consider

$$\epsilon_f > c^2 \log(p)/(n\kappa_u) \left( \sqrt{\frac{2}{1 + \gamma}} - \sqrt{\frac{2}{2 + \gamma}} \right)^{-2}.$$

Theorem 1 then follows by combining Lemmas 1,2,3,6, using the same arguments as in the proof of Theorem 1 in [1].  $\square$

## References

- [1] Ali Jalali, Christopher C. Johnson, and Pradeep D. Ravikumar. On learning discrete graphical models using greedy methods. *Advances in Neural Information Processing Systems (NIPS) and extended arxiv version*, 2011.
- [2] Christopher C. Johnson, Ali Jalali, and Pradeep D. Ravikumar. High-dimensional sparse inverse covariance estimation using greedy methods. *Journal of Machine Learning Research - Proceedings Track*, 22:574–582, 2012.
